# Supplementary material for: Relationship between the structural characteristics of retinal and its visual function—a theoretical study
Source: Royal Society of Chemistry journal article supplement (doi:10.1039/d3nj01929b), 2023-01-01
Supplement: d3nj01929b1.pdf [file d3nj01929b1.pdf]

## Relationship Between the Structural Characteristics of Retinal and Its Visual Function—A Theoretical Study

Jin Feng, Baofeng Li, Xinlu Wang, Xinlong Mao, Tengfei Ma, Dapeng Zhang and Siwei Bi

Key Laboratory of Catalytic Conversion and Clean Energy in Universities of Shandong Province, Qufu Normal University, P. R. China.

**Keywords:** retinal, terminal group, conjugation length, saturated group, theoretical study

### Authors for correspondence:

Dapeng Zhang

e-mail: zdp1014636837@hotmail.com

Siwei Bi

e-mail: siweibi@126.com

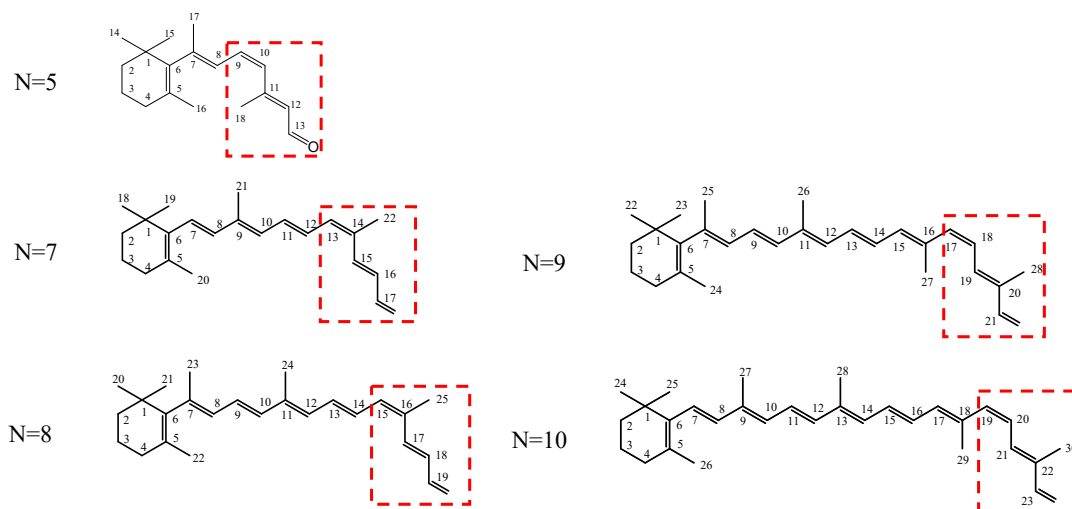

Fig. S1 Structures for 11-cis retinal derivatives with N=5 and 7-10, where the conjugated skeleton in the red box is the same as retinal, while the position of -CH<sub>3</sub> is arranged according to the arrangement rule in carotenoids.

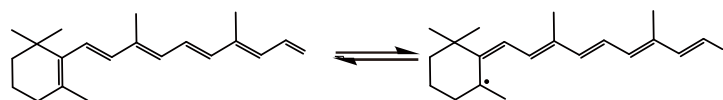

Fig. S2 The closed-shell and double radical form of retinal.

| Retinal Derivatives | HOMO (eV) | LUMO (eV) | Gap (eV) |
|---------------------|-----------|-----------|----------|
| C=O                 | -5.37     | -2.34     | 3.03     |
| C=C                 | -4.82     | -1.70     | 3.12     |
| C=N                 | -5.09     | -1.97     | 3.12     |

Table S1 The energies of frontier orbitals for retinal with C=O, C=N and C=C.

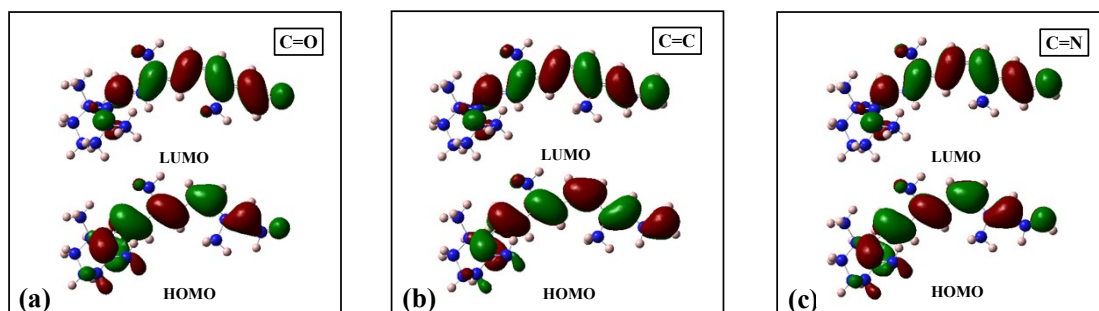

Fig. S3 The orbital distribution for 11-*cis* retinal and derivatives with terminal group C=C and C=N.

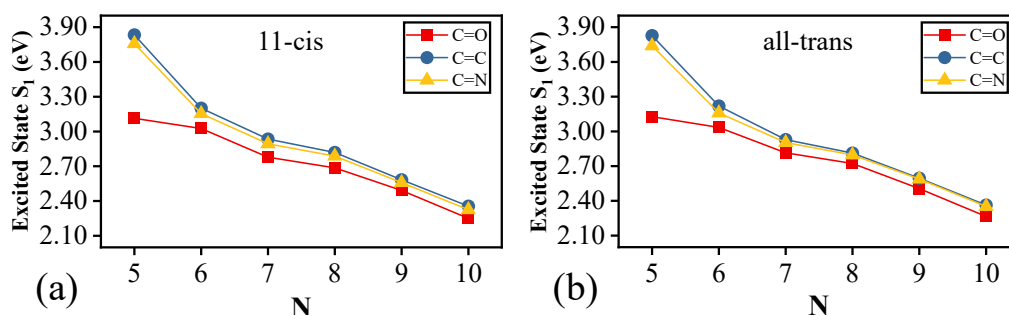

Fig. S4 The values of excited state  $S_1$  for retinal derivatives with  $N=5$  and  $7-10$  in 11-*cis* and all-*trans* configurations by b3lyp method.

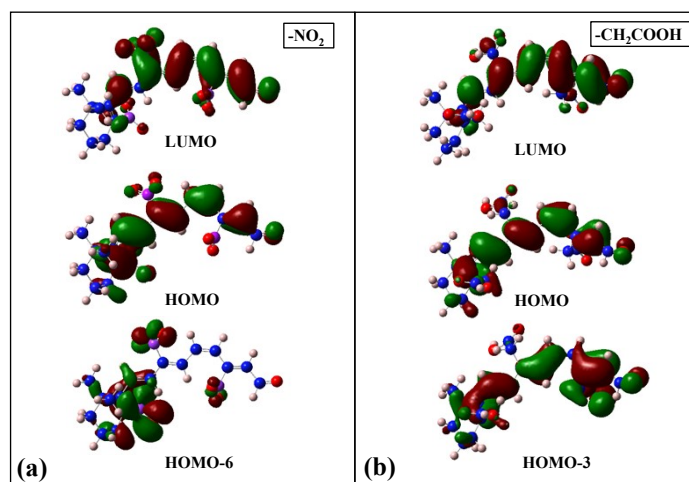

Fig. S5 Molecular orbitals for retinal with  $R=NO_2$  (left) and  $R=CH_2COOH$  (right). C, O, N and H atoms are shown in blue, red, purple and pink, respectively.

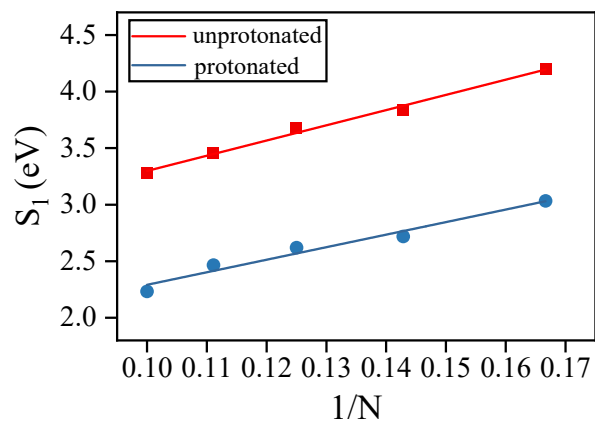

Fig. S6 The energy of S<sub>1</sub> for all-*trans* retinal and its derivatives with N=6-10.
